# Supplementary material for: Genetic Susceptibility to Rotavirus Gastroenteritis and Vaccine Effectiveness in Taiwanese Children
Source: PubMed Central journal article supplement (PMC5526899; doi:10.1038/s41598-017-06686-y), 2017-07-25
Supplement: 41598_2017_6686_MOESM1_ESM.pdf [file 41598_2017_6686_MOESM1_ESM.pdf]

**Title: Genetic Susceptibility to Rotavirus Gastroenteritis and Vaccine Effectiveness in Taiwanese Children**

**Ting-An Yang<sup>1#</sup>, Ju-Yin Hou<sup>1#</sup>, Yhu-Chering Huang,<sup>1,2</sup> Chih-Jung Chen<sup>1,2\*</sup>**

<sup>1</sup>College of Medicine, Chang Gung University, 333 Taoyuan, Taiwan,

<sup>2</sup>Division of Paediatric Infectious Diseases, Department of Paediatrics, Chang Gung Memorial Hospital, 333 Taoyuan, Taiwan

<sup>#</sup>These authors contributed equally to this work

Supplementary Table 1. Characteristics of children with rotavirus gastroenteritis of distinct severity and demographics of the healthy controls, 2013-2016, northern Taiwan

| Factor                               | Cases         |                    |                  | Controls<br>(n=133) | $P_1^*$ | $P_2^*$ |
|--------------------------------------|---------------|--------------------|------------------|---------------------|---------|---------|
|                                      | All<br>(n=68) | Moderate<br>(n=15) | Severe<br>(n=53) |                     |         |         |
| Demographics                         |               |                    |                  |                     |         |         |
| Male gender (%)                      | 36 (53)       | 6 (40)             | 30 (57)          | 72 (54)             | 0.26    | 0.87    |
| Age, months                          | 42.6 ± 31.6   | 39.7 ± 39.2        | 43.5 ± 23.5      | 39.0 ± 36.0         | 0.69    | 0.48    |
| Body weight, kg                      | 16.0 ± 14.2   | 13.7 ± 7.9         | 16.7 ± 15.5      | 15.3 ± 9.9          | 0.48    | 0.66    |
| Breast feeding (%)                   | 62 (91)       | 13 (87)            | 49 (93)          | 109 (82)            | 0.49    | 0.08    |
| Rotavirus vaccination (%)            | 8 (12)        | 3 (20)             | 5 (9.4)          | 77 (58)             | 0.26    | <0.001  |
| Household member having diarrhea (%) | 29 (43)       | 7 (47)             | 22 (42)          | 5 (3.8)             | 0.72    | <0.001  |
| Underlying disease                   |               |                    |                  |                     |         |         |
| Atopic dermatitis (%)                | 9 (13)        | 3 (20)             | 6 (11)           | 22 (17)             | 0.38    | 0.54    |

|                           |         |         |         |          |      |      |
|---------------------------|---------|---------|---------|----------|------|------|
| Asthma (%)                | 0 (0)   | 0 (0)   | 0 (0)   | 6 (4.5)  | --   | 0.75 |
| Allergy rhinitis (%)      | 3 (4.4) | 1 (6.7) | 2 (3.8) | 12 (9.0) | 0.63 | 0.24 |
| Nephrotic syndromes (%)   | 0 (0)   | 0 (0)   | 0 (0)   | 1 (0.8)  | --   | 0.47 |
| Developmental delay (%)   | 0 (0)   | 0 (0)   | 0 (0)   | 1 (0.8)  | --   | 0.47 |
| Malignant solid tumor (%) | 0 (0)   | 0 (0)   | 0 (0)   | 1 (0.8)  | --   | 0.47 |

#### Clinical features

|                             |  |           |           |  |        |
|-----------------------------|--|-----------|-----------|--|--------|
| Hospital stay, days         |  | 5.4 ± 2.5 | 4.7 ± 2.1 |  | 0.25   |
| Fever (%)                   |  | 12 (80)   | 51 (96)   |  | 0.03   |
| Fever duration, days        |  | 2.1 ± 1.5 | 3.6 ± 3.0 |  | 0.07   |
| Vomiting (%)                |  | 9 (60)    | 52 (98)   |  | <0.001 |
| Max no. of vomiting per day |  | 3.5 ± 5.2 | 7.6 ± 6.5 |  | 0.03   |
| Vomiting duration, days     |  | 1.6 ± 2.0 | 2.6 ± 1.3 |  | 0.03   |
| Diarrhea (%)                |  | 11 (73)   | 53 (100)  |  | <0.001 |
| Max no. of diarrhea per day |  | 4.1 ± 5.3 | 6.8 ± 4.7 |  | 0.06   |
| Diarrhea duration, days     |  | 1.8 ± 1.4 | 3.7 ± 1.5 |  | <0.001 |

|                                      |                  |                  |      |
|--------------------------------------|------------------|------------------|------|
| Bloody stool (%)                     | 2 (13)           | 6 (11)           | 0.83 |
| Convulsion (%)                       | 1 (6.7)          | 3 (5.7)          | 0.88 |
| Use of parenteral antibiotics (%)    | 5 (33)           | 11 (21)          | 0.31 |
| Laboratory data                      |                  |                  |      |
| White blood cell count (/ $\mu$ l)   | 12380 $\pm$ 7508 | 10049 $\pm$ 5075 | 0.17 |
| Immature neutrophil count (%)        | 0.9 $\pm$ 1.9    | 0.9 $\pm$ 2.8    | 0.99 |
| Hemoglobin (g/ $\mu$ l)              | 11.9 $\pm$ 1.4   | 12.6 $\pm$ 1.1   | 0.03 |
| C-reactive protein (mg/l)            | 12.9 $\pm$ 16.5  | 14.4 $\pm$ 35.8  | 0.87 |
| Positive stool bacterial culture (%) | 1 (6.7)          | 0 (0)            | 0.06 |

---

\* $P_1$  statistical test between the case subjects with moderate diseases and those with severe diseases. \* $P_2$  statistical test between the case subjects and the control subjects
